# Supplementary material
Source: PubMed Central journal article supplement (PMC8597047)

mNG::PH; H2B::mCherry

*en face* view

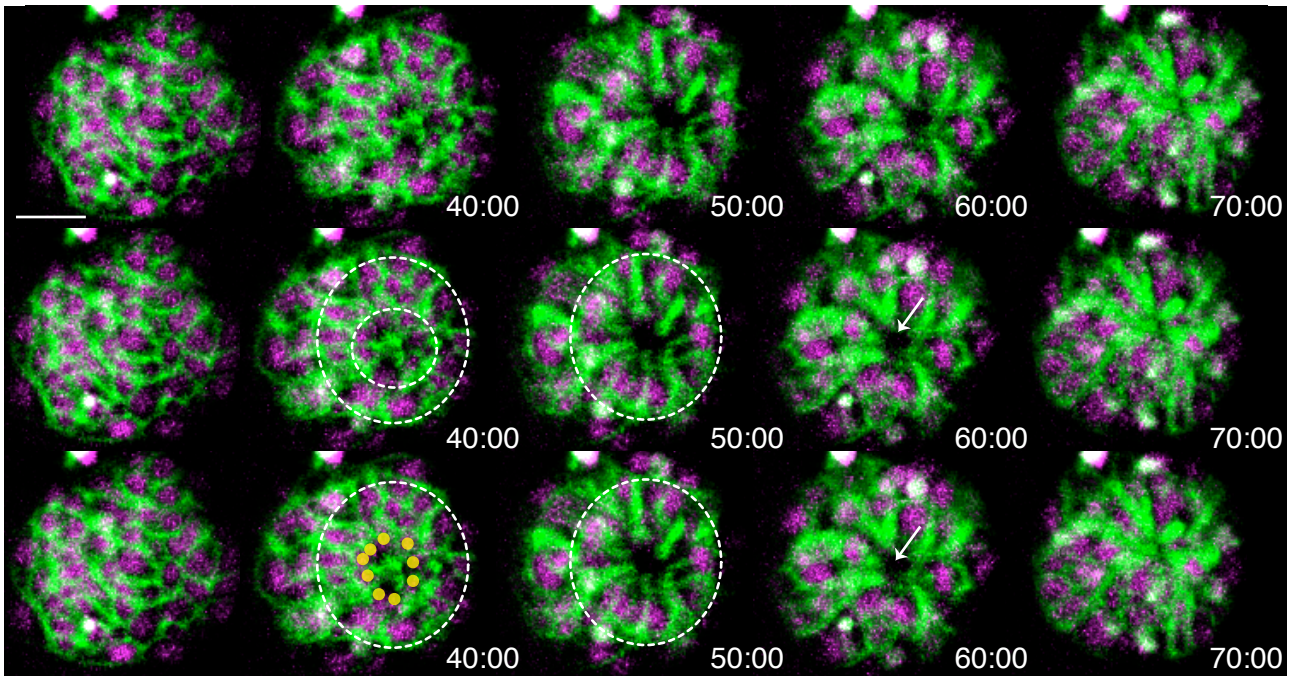

**Figure S1**

Supplement: NIHMS1655874-supplement-Supplemental_Figure_1.pdf [file NIHMS1655874-supplement-Supplemental_Figure_1.pdf]

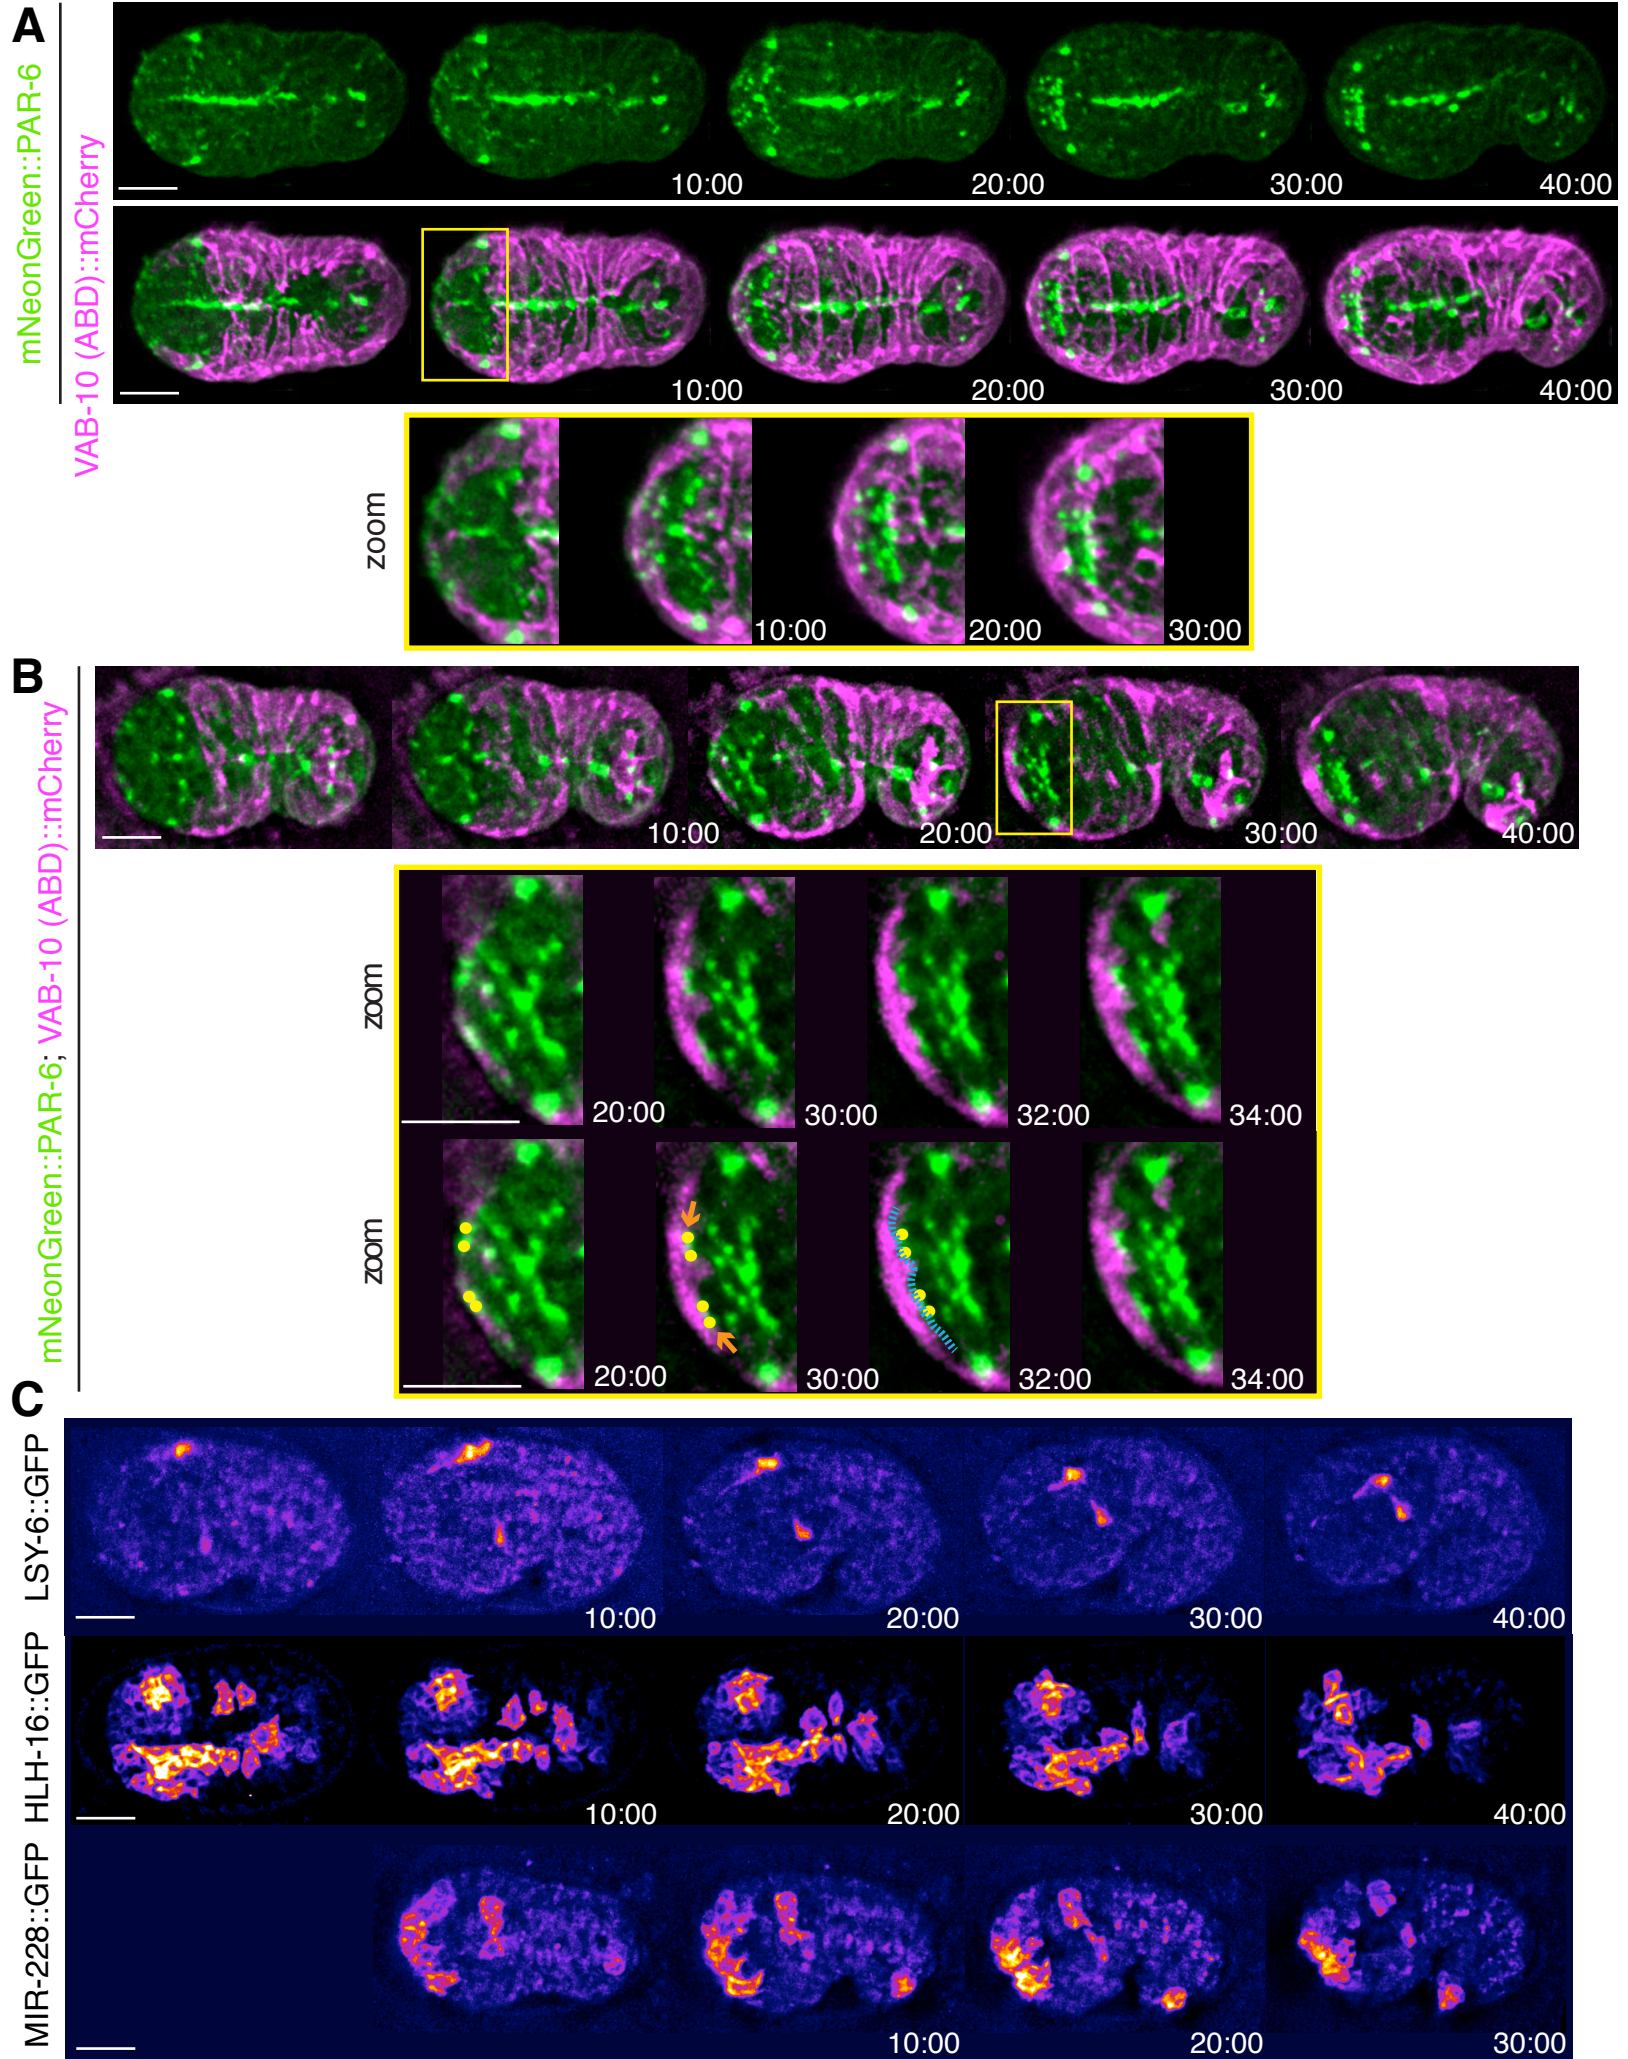

Figure S2

Supplement: NIHMS1655874-supplement-Supplemental_Figure_2.pdf [file NIHMS1655874-supplement-Supplemental_Figure_2.pdf]

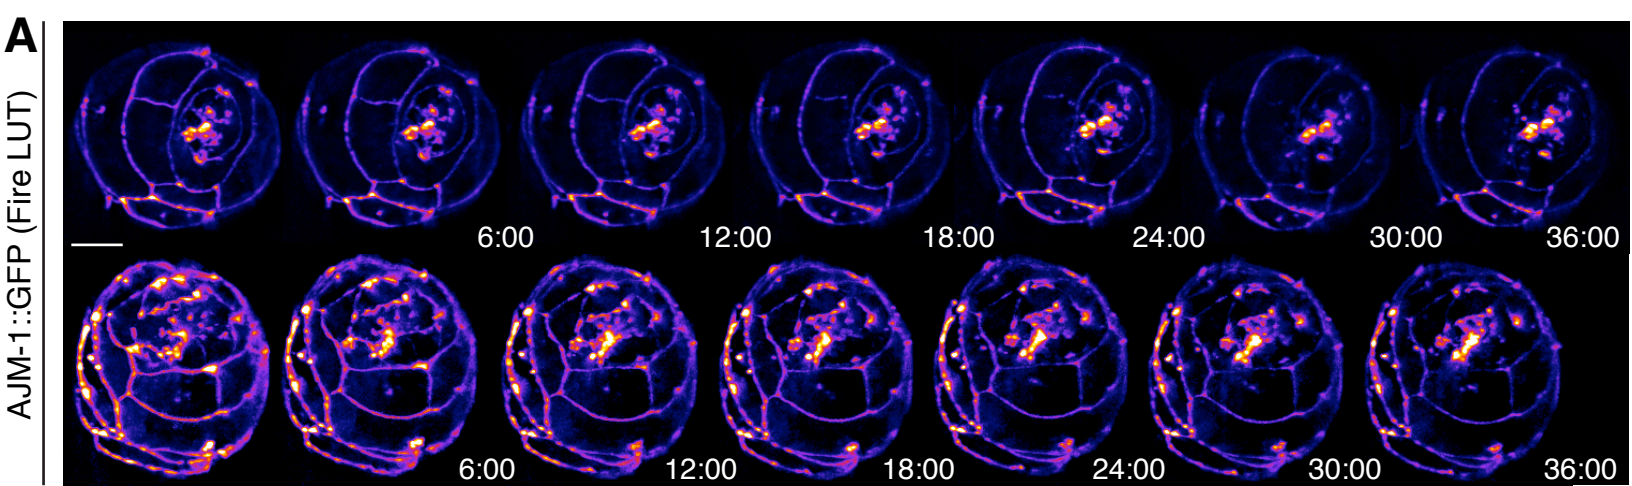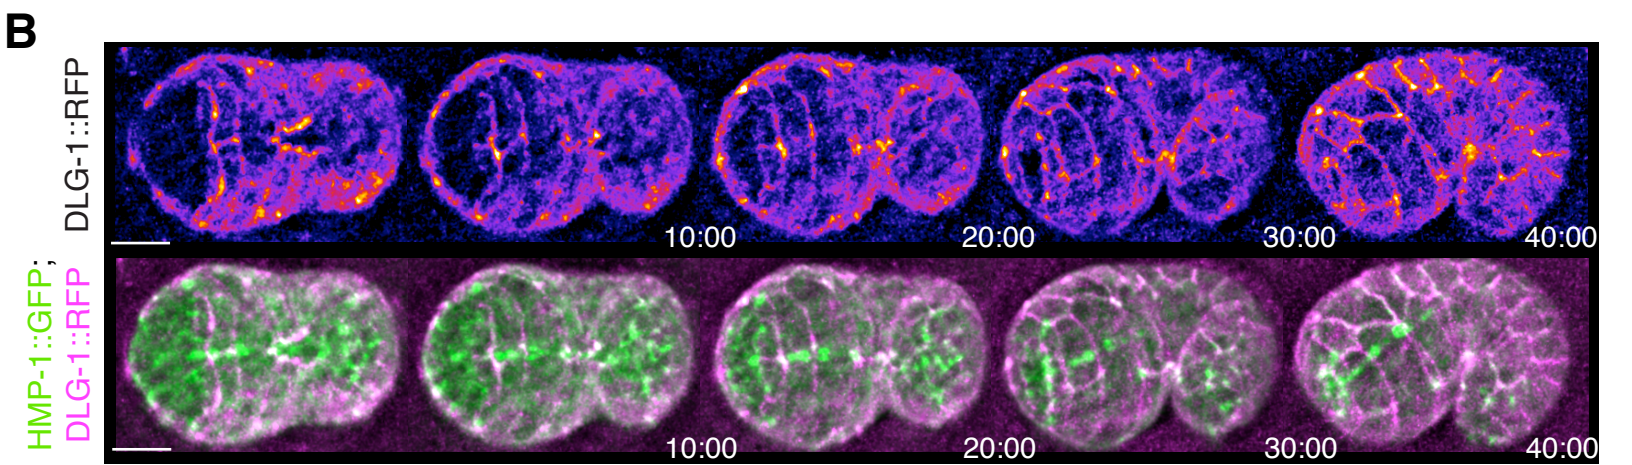

Figure S3

Supplement: NIHMS1655874-supplement-Supplemental_Figure_3.pdf [file NIHMS1655874-supplement-Supplemental_Figure_3.pdf]

mNeonGreen::PAR-6;VAB-10 (ABD)::mCherry

*ani-1* RNAi

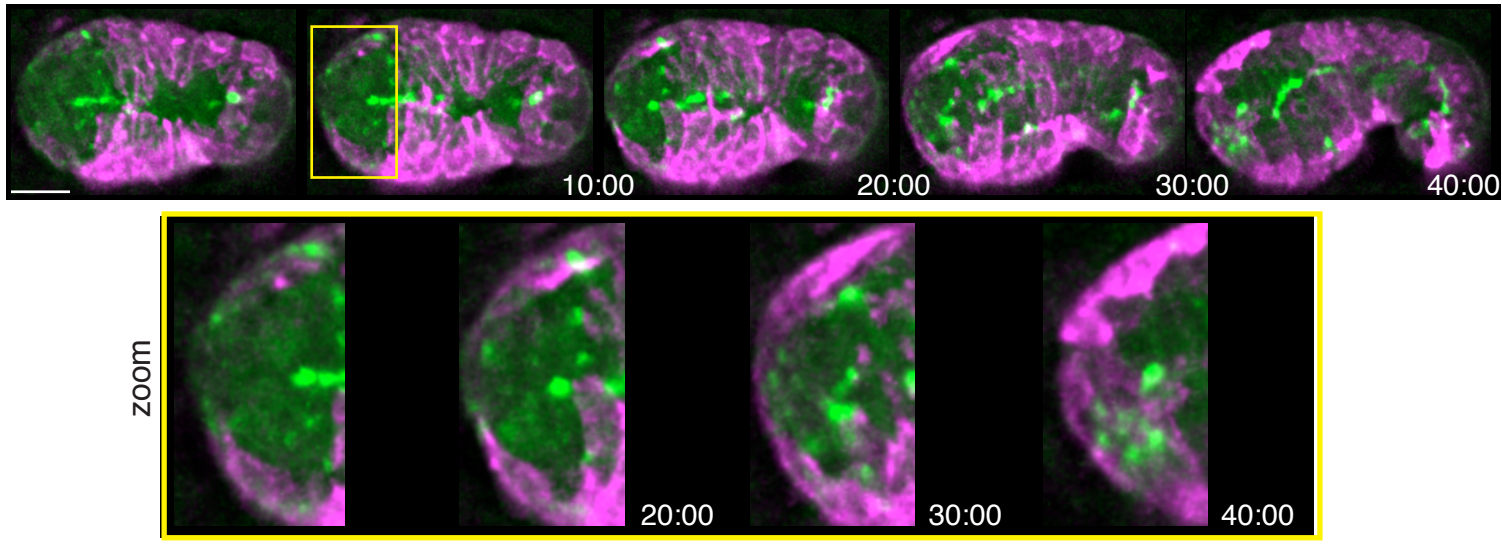

Figure S4

Supplement: NIHMS1655874-supplement-Supplemental_Figure_4.pdf [file NIHMS1655874-supplement-Supplemental_Figure_4.pdf]
